1                   **Using TrackMate to Analyze *Drosophila* Larval and Adult**  
2                                                           **Locomotion**

3           Alisa A. Omelchenko<sup>1</sup>, Ainul Huda<sup>1</sup>, Allison N. Castaneda<sup>1</sup>, Thomas J. Vaden<sup>1</sup>, Lina Ni<sup>1#</sup>

4   <sup>1</sup> School of Neuroscience, Virginia Tech, Blacksburg, Virginia, USA

5   # corresponding author

6   E-mail: [linani@vt.edu](mailto:linani@vt.edu)

7   ORCID: 0000-0003-2155-5155

8

9   **Key words:** TrackMate, *Drosophila*, larvae, adult, behavior, two-choice assay, optogenetics

10

11   **Summary statement**

12   This study uses an open-source Fiji plugin TrackMate to computationally analyze *Drosophila*  
13   adult and larval behavioral assays, which does not require programming skills.

14 **Abstract**

15 *Drosophila* adult and larvae exhibit sophisticated behaviors that are widely used in development,  
16 synaptic transmission, sensory physiology, and learning and memory research. Many of these  
17 behaviors depend on locomotion, the ability of an animal to move. However, the statistical analysis  
18 of locomotion is not trivial. Here we use an open-source Fiji plugin TrackMate to track the  
19 locomotion of *Drosophila* adults and larvae. We build optimal experimental setups to rapidly  
20 process recordings by Fiji and analyze by TrackMate. We also provide tips for analyzing non-  
21 optimal recordings. TrackMate extracts the X and Y positions of an animal on each frame of an  
22 image sequence or a video. This information allows for generating moving trajectories, calculating  
23 moving distances, and determining preference indices in two-choice assays. Notably, this free-cost  
24 analysis method does not require programming skills.

25

## 26 **Introduction**

27 *Drosophila melanogaster* exhibit sophisticated behaviors that are widely used in studies of  
28 development, synaptic transmission, sensory physiology, and learning and memory. Many of these  
29 behaviors depend on locomotion, the ability of an animal to move. The locomotion analysis of  
30 larvae and adult flies is essential to gather insights into how modifications of genetic components  
31 affect animal behaviors and responses to stimuli. The examination of their movement thereby has  
32 become an integral part of such studies leading to the development of tracking systems to provide  
33 a quantitative description of their behaviors (Bellen et al., 2010).

34 Several tracking systems have been developed to track the locomotion of larvae and adult  
35 flies and generate trajectories (Werkhoven et al., 2019, Branson et al., 2009, Valente et al., 2007,  
36 Straw and Dickinson, 2009, Colomb et al., 2012). However, many methods require programming  
37 skills and/or commercial software to set up and run the tracking systems, which often become  
38 obstacles for researchers to adopt these methods. Other methods require specific experimental  
39 setups to collect data and are challenging to analyze non-optimal recordings. Therefore, it is not  
40 trivial to statistically analyze the locomotion of larvae and adult flies. There is a need to develop  
41 an open-source approach that does not require programming skills but can computationally track  
42 the movement of larvae and adult flies and generate trajectories. Ideally, this method can analyze  
43 non-optimal recordings.

44 In this study, we use an open-source Fiji plugin TrackMate to achieve this goal. We build  
45 optimal experimental setups to rapidly process and analyze behavioral recordings. We also provide  
46 examples of analyzing non-optimal recordings. TrackMate extracts the X and Y positions of an  
47 animal on each frame. This information allows for generating moving trajectories, calculating  
48 moving distances, and determining preference indices in two-choice assays. Notably, this free-cost  
49 analysis method does not require programming skills. This method is validated by analyzing the  
50 free motion and two-choice thermotactic behavioral discrepancies of wild type and thermoreceptor  
51 mutants in larvae and adult flies.

## 52 **Results**

### 53 **Using TrackMate to analyze the locomotion of adult flies**

54 We first used TrackMate to analyze the locomotion of adult flies. Since TrackMate recognizes  
55 particles (regions of interest (ROIs)) based on their intensities, background noise signals can be  
56 recognized and mistakenly tracked as ROIs. We suggested maximally diminishing the background

57 noise signals by performing the assay on a piece of white paper (**Fig. 1A**). In our setup, the fly was  
58 covered by a transparent cover that only allowed the fly to walk, not fly. A Styrofoam box was  
59 placed to cover the experimental region to create a featureless environment with dim ambient light  
60 of < 10 lux. A GoPro camera was installed on the ceiling in the Styrofoam box to take time-lapse  
61 pictures (1 picture per second) for 2 minutes. These pictures were then imported into Fiji as an  
62 image sequence and preprocessed. Next, TrackMate was run to track the fly movement, extract its  
63 X and Y positions, generate the trajectory (**Fig. 1C**), and the moving distance was calculated (**Fig.**  
64 **1D**). We found that the warm receptor mutant, *Gr28b<sup>MB</sup>*, moved significantly more than *wild-type*  
65 (*wt*) flies (**Fig. 1C,D; Movie 1**).

66 TrackMate was also used to analyze the two-choice assay. In the two-choice assay, a line  
67 was drawn to separate different temperatures (**Fig. 1E**). According to the X position of the line  
68 and the X position of the fly on each frame, the time the fly spent in each temperature zone was  
69 calculated and the preference index was determined. While *wt* flies avoided 31°C and preferred  
70 25°C, *Gr28b<sup>MB</sup>* did not show preference between 25°C and 31°C (**Fig. 1F**). This result is consistent  
71 with previous reports (Ni et al., 2013, Simões et al., 2021, Budelli et al., 2019). Moreover, *Gr28b<sup>MB</sup>*  
72 also moved more than *wild-type* (*wt*) flies in this condition (**Fig. 1D,E; Movie 1**).

73 An optogenetic assay was also analyzed by TrackMate. The optogenetic tool used in this  
74 study was the red light-shifted channelrhodopsin CsChrimson. When bound to all-trans retinal  
75 (ATR), CsChrimson is activated by the red light to depolarize cells (Klapoetke et al., 2014). To  
76 create the dark and red-light environments, a red-light source was placed on the ceiling in the  
77 Styrofoam box and half of the transparent cover was covered by black tape (**Fig. 1B**). Of note, the  
78 red light must not be directly above the cover (See the section of Using TrackMate to analyze  
79 nonoptimal recordings and **Fig. 3**). We suggested installing the GoPro camera in the middle of the  
80 Styrofoam box, the light source on its left, and the experimental region at the right of the Styrofoam  
81 box (**Fig. 1B**). The recording procedure and analysis method were similar to the two-choice assay.  
82 Heating Cells (HCs) in arista drive warm avoidance (Gallio et al., 2011, Budelli et al., 2019, Ni  
83 et al., 2013). Flies expressing CsChrimson in HCs avoided red light with dietary ATR (**Fig. 1G,H;**  
84 **Movie 1**). Without ATR, HCs weren't activated and did not guide flies to avoid the red light. This  
85 was validated by the observation that flies often traveled from the dark zone to the red-light zone  
86 and thus the red-light zone had multiple tracks (**Fig. 1G; Movie 1**).

## 88 **Using TrackMate to analyze the larval locomotion**

89 Next, we used TrackMate to track the larval movement and analyzed the larval two-choice  
90 thermotactic assay. The larva was allowed to move on 3% agar gel. To diminish the background  
91 noise signals and increase contrast, a sheet of matte black poster was placed under the gel and  
92 ambient light was dimmed to under 10 lux. A GoPro camera was placed above the gel to record the  
93 larval movement for 2 min. For the two-choice assay, the larva was released in the middle of two  
94 temperatures (**Fig. 2A**). The 2-min video was imported into Fiji and preprocessed. For the two-  
95 choice assay, a line was drawn to separate different temperatures. Of note, this line must not pass  
96 the moving path of the larva (**Fig. 2E**). TrackMate was then used to track the larval movement and  
97 generate its trajectory (**Fig. 2C,E**). TrackMate also extracted X and Y positions of the larva on  
98 each frame to calculate its moving distance and preference index (**Fig. 2D,F**).

99 IR93a is a subunit of the cool receptor in dorsal organ cool cells (DOCCs) and guides larvae  
100 to avoid cool temperatures (Knecht et al., 2016). In a unique temperature environment, moving  
101 distances of *wt* and *Ir93a<sup>MI</sup>* larvae were similar (**Fig. 2C,D; Movie 1**). However, *Ir93a<sup>MI</sup>* larvae  
102 moved significantly less than *wt* larvae in a two-temperature environment (**Fig. 2D,E; Movie 1**).  
103 Regarding preference indices, *wt* larvae preferred 18°C (**Fig. 2E,F; Movie 1**). This is consistent  
104 with previous reports (Kwon et al., 2008, Kwon et al., 2010, Shen et al., 2011). The *Ir93a<sup>MI</sup>* larvae  
105 had no preference between 18°C and 25°C, suggesting IR93a is required for choosing the optimal  
106 temperature within this temperature range (**Fig. 2E,F; Movie 1**).

107 The larval optogenetic assay must be performed under an infrared condition while avoiding  
108 light glares. The red-light intensity should be even across the region where the larva travels (**Fig.**  
109 **2B**). The recording procedure and analysis method were similar to the free motion assay. Larvae  
110 expressing *CsChrimson* in DOCCs showed aversive behaviors under red light with dietary ATR,  
111 such as the pause of run, which in turn led to the decrease of the run speed (**Fig. 2G,H**) (Tyrrell et  
112 al., 2021). These aversive behaviors reflected the cool avoidance driven by DOCCs and were not  
113 observed in the group without ATR (**Fig. 2G,H**).

114

## 115 **Using TrackMate to analyze non-optimal recordings**

116 If behavioral recordings are available and computational analysis is required, TrackMate is an  
117 option. The analysis process may take longer if the recordings contain background noise signals.  
118 **Fig. 3A** showed a setup for optogenetics previously used in the lab (Tyrrell et al., 2021). The light

119 source was placed under an agar plate so the light source and light glares were recorded (**Fig. 3A**).  
120 After being gray scaled, the larva was detected but a significant amount of background noise  
121 signals were also shown (**Fig. 3B**; the new setup had a cleaner background shown in **Fig. 2G**). We  
122 suggested cropping the video and using the smallest possible region for analysis. Fiji parameters,  
123 such as background, brightness, and contrast, must be adjusted to diminish background noise  
124 signals. In most cases, not all background noise signals could be avoided (circle in **Fig. 3B**).  
125 TrackMate parameters, including LoG detector, filters on spots, simple LAP tracker, and filters on  
126 tracks, must also be optimized to detect the larva in most frames (>99%) and maximally decrease  
127 noise signals. Finally, the All Spots statistics.csv file must be carefully checked to ensure all ROIs  
128 related the larva, not noise signals. The colorful track suggested the larva was not detected or  
129 counted more than once on some frames so that multiple tracks were generated (**Fig. 3B**). Although  
130 having taken longer to process and analyze, these non-optimal recordings found similar results that  
131 DOCC expression of CsChrimson drove aversive behaviors (**Fig. 3C**).

## 132 **Discussion**

133 In this study, we apply an open-source Fiji plugin TrackMate to track the locomotion of adult flies  
134 and larvae in image sequences and videos and generate trajectories. Since TrackMate extracts the  
135 X and Y positions of an animal on each frame, it is used to analyze preference indices in two-  
136 choice assays, in which the separating line can be defined as X or Y positions. In addition,  
137 TrackMate can be used to analyze non-optimal recordings with strong background noise signals.

138 Clean background facilitates the analysis. TrackMate detects ROIs – flies or larvae – based  
139 on their intensities. It cannot distinguish ROIs from background noise signals if they have similar  
140 sizes and/or intensities. Thereby, noise signals cause aberrant trajectories and require researchers  
141 to adjust TrackMate parameters to avoid these signals or check the All Spots statistics.csv file to  
142 delete information for noise signals in the file. We provide easy ways to get clean backgrounds –  
143 a piece of white paper and matte black poster sheet can significantly decrease background noise  
144 signals in adult and larval behavioral assays, respectively.

145 TrackMate extracts the X and Y positions of the ROI on each frame. According to this  
146 information, the moving distance is determined, calculated in pixels. If moving distances from two  
147 experiments need comparing, it is essential to convert the pixel distance to the actual distance.  
148 Moreover, the camera position and image size must be kept constant from trial to trial to avoid the

149 conversion. To keep the analysis simple and accurate, we recommend using the same setup to  
150 perform all experiments that need comparing.

151 TrackMate can analyze data recorded in image sequences and videos. In this study, we use  
152 time-lapse images to record adult behaviors and videos to record larval behaviors. Thereby,  
153 analysis approaches for both recording methods have been shown. In videos, every second contains  
154 24-30 frames; their high temporal resolutions can resolve more behavioral details. When  
155 calculating moving distances and preference indices, high temporal resolutions are not necessary.  
156 In this case, time-lapse images become a better choice because they contain less data and take a  
157 shorter time to analyze. However, the time-lapse image resolution of the GoPro cannot distinguish  
158 the larva from the background and videos are used for larval assays instead. When performing the  
159 larval optogenetic assay, we find it is easier to track the larva under infrared conditions. Of note,  
160 regular cameras don't work under infrared conditions – the internal infrared filter needs to be  
161 removed and replaced by an 830 nm long-pass filter.

162 Based on trajectories, researchers can observe whether an animal runs or turns. But  
163 TrackMate may not be used to analyze more complex behaviors, such as larval head sweeping.  
164 We set a relatively large blob diameter to make TrackMate recognize the adult fly or larva as a  
165 single ROI. If using a relatively small blob diameter, TrackMate often detects the animal as  
166 multiple ROIs. But the localization of each ROI cannot be predicted; in other words, TrackMate  
167 cannot be used to recognize different parts of an animal, such as the head or tail. Thereby, it is  
168 challenging to use TrackMate to analyze more complex behaviors.

169

## 170 **Materials and methods**

### 171 ***Drosophila* strains**

172 *CS* and *WCS* were used as wild-type controls for larval and adult behavioral assays, respectively.  
173 The following flies were previously described: *UAS-CsChrimson* (Klapoetke et al., 2014), *Ir93a<sup>MI</sup>*  
174 (Knecht et al., 2016), *Ir93a-Gal4* (Sanchez-Alcaniz et al., 2018), *Gr28b<sup>MB</sup>* (Ni et al., 2013), *HC-*  
175 *Gal4* (Gallio et al., 2011).

176

### 177 **Adult behavioral assays**

178 Flies were raised at 25°C under 12-hour light/12-hour dark cycles and were 3-7 days old when  
179 tested. For the two-choice thermotactic assay, two steel plates on different hot plates were aligned



180 so that the steel plate boundaries were brought together. Hotplate temperatures were adjusted  
181 allowing the surface of the steel plates to be  $25\pm 1^\circ\text{C}$  and  $31\pm 1^\circ\text{C}$ , respectively. For the free  
182 movement behavioral assay, a steel plate was placed on a hot plate and its surface temperature was  
183 adjusted to  $25\pm 1^\circ\text{C}$ . The plates were sprayed with  $\text{dH}_2\text{O}$  and a plastic sheet protector was placed  
184 on top. Excess moisture was removed by Kimwipe. A white paper was placed on top of the plastic  
185 sheet protector to reduce background noise signals. A clear plastic cover was covered with  
186 SigmaCote to prevent the fly from walking on the plastic cover and was placed on top of the white  
187 sheet so that it was divided evenly on the steel plate boundary creating the experimental chamber.  
188 The temperature was monitored before each trial using a surface temperature probe (80PK-3A,  
189 Fluke) and thermometer (Fisherbrand Traceable Big-Digit Type K Thermometer). A *wild-type*  
190 control was run at the beginning of every data collection session. For the experiment, a fly of  
191 known sex was placed under the plastic cover and a Styrofoam box was placed to cover the  
192 experimental area to remove light and allow for the experiment to be conducted in dim ambient  
193 light ( $<10$  lux). The flies were given 2 minutes to acclimate on the  $25\pm 1^\circ\text{C}$  side. A HERO8 GoPro  
194 was positioned at the top of the Styrofoam box (8 inches in height). The motion of the fly was  
195 recorded by taking a time-lapse photo every second for 120 seconds.

196 Adult optogenetic assays were recorded by a HERO8 GoPro. Half of a clear plastic cover  
197 was covered with black tape. A piece of white paper was put under the cover to reduce noise from  
198 the background. A Styrofoam box was used to cover the experimental area. A HERO8 GoPro was  
199 mounted at the top of the Styrofoam box. On one side of the GoPro, a red-light source (Tyrrell et  
200 al., 2021) was attached. The plastic cover was placed on the other side of the GoPro to avoid the  
201 glare that is caused by the direct light. A single fly of known sex was pipetted under the plastic  
202 cover and given 2 minutes to acclimate. The light source was turned on and the motion of the fly  
203 was recorded by taking a time-lapse photo every second for 60 seconds. Positive and negative  
204 controls were run at the beginning of every data collection session.

205

### 206 **Larval behavioral assays**

207 Flies were maintained at  $25^\circ\text{C}$  under 12-hour light/12-hour dark cycles. Larvae were collected as  
208 described with some modifications (Tyrrell et al., 2021). Briefly, each vial contained 20-45 males  
209 and females. These flies were given at least 24 hours to recover from  $\text{CO}_2$  before being tapped  
210 over to new vials containing yeast granules. They were allowed 4 to 8 hours to lay eggs and, on



211 day 4, larvae were collected using 10 mL of 20% w/v sucrose solution. Larvae were collected after  
212 20 minutes and thoroughly washed three times with diH<sub>2</sub>O. Larvae were then plated on a 60 mm  
213 tissue culture dish (Corning) with about 13 mL of 3% room temperature (about 20°C) agar gel and  
214 given 5 to 10 minutes to recover from the washing process and acclimate to the agar.

215 The two-choice assay was performed as described with some modifications (Tyrrell et al.,  
216 2021). Two steel plates on different hot plates were separated by 1/16 inches (the release zone).  
217 For the free movement behavioral assay, a steel plate was placed on a hot plate and its surface  
218 temperature was adjusted to 18±1°C. A matte black poster sheet was placed on top of steel plates.  
219 A plastic sheet protector was placed on the poster sheet to prevent warping from moisture. A 3%  
220 agar gel (10 X 9.5 inched) was placed on the plastic protector sheet and evenly positioned at the  
221 release zone. The surface temperature was 18±1°C on one side of the gel and 25±1°C on the other.  
222 The release zone was labeled at the top and bottom of the gel. The temperature was monitored  
223 before each trial using a surface temperature probe (80PK-3A, Fluke) and thermometer  
224 (Fisherbrand Traceable Big-Digit Type K Thermometer). A *wild-type* control was run at the  
225 beginning of daily experiments. Water was gently sprayed between trials to moisten the agar  
226 surface. A larva was placed at the release zone and given 2 minutes to wander. The experiment  
227 was conducted at dim ambient light (<10 lux). A GoPro was suspended above the gel (10.5 in) to  
228 record the motion of the larva for each trial.

229 Larval optogenetic assays were recorded by a Sony HDR-CX405 camcorder with the  
230 internal infrared filter removed and an 830 nm long-pass filter (FSQ-RG830, Newport) installed.  
231 A 3% agar gel was cut to 3 X 5 inches. A sheet of a matte black poster was placed under the gel  
232 to reduce background noise signals and infrared light (4331910725, Amazon) was used to visualize  
233 the larvae. Two red-light sources (Tyrrell et al., 2021) were attached 10 inches above the gel at a  
234 45° angle on both sides of the gel such that the light intensity was even throughout the gel (~3  
235 klux) and no glare was created. A third red-light source was placed in a box outside the  
236 experimental setup but within the view of the camera to serve as an indicator to record when red  
237 lights were on or off. Larvae were collected and prepared for the assay as detailed above except  
238 that they were kept in food with 40 µM all *trans*-retinal (ATR, Sigma-Aldrich) and in dark for 72  
239 hours. An individual larva was placed on the agar gel and given 30 seconds to acclimate. For the  
240 recording, the larva was given 30 seconds to wander followed by 3 cycles of 5 seconds shone  
241 under red lights and a 15 second recovery period.

242

243 **Preprocessing photos for adult behavioral assays**

244 The individual photos for each trial were combined into a single file using Fiji and converted to 8-  
245 bit grayscale (File > Import > Image Sequence function; boxes of Convert to 8-bit Grayscale and  
246 Sort names numerically were selected) (Schindelin et al., 2012). For two-choice and optogenetic  
247 assays, the Rotate feature (Image > Transform > Rotate) was used to rotate images until the steel  
248 plate dividing line or tape line was shown as completely vertical. A black line was drawn along  
249 the steel plate boundary to separate the two steel plates (temperatures) using the draw function  
250 (Edit > Draw) and applied to all images. Then, for all the assays, the Crop feature (Image > Crop)  
251 was used to only keep the experimental area. Next, backgrounds were subtracted from all images  
252 (Process > Subtract Background; set rolling ball radius of 20.0 pixels; the box of light background  
253 was selected). The brightness/contrast was adjusted to enhance the difference between the dark fly  
254 and the white background (Image > Adjust > Brightness/Contrast). Lastly, the threshold was set  
255 to the automatic suggested setting (Image > Adjust > Threshold; Default and B&W settings were  
256 chosen, the box of Don't reset range was selected). In the Convert Stack to Binary box, the method  
257 was set to default, background was set to light, and the box corresponding to calculate threshold  
258 for each image was selected. The preprocessed image was then saved as a TIFF (File > Save as >  
259 TIFF) for analysis.

260

261 **Preprocessing videos for larval behavioral assays**

262 Videos were converted to .avi and the resolution was decreased to 760x480 by Any Video  
263 Converter 9 (AnvSoft). They were then uncompressed by the command line tool ffmpeg to be  
264 compatible with Fiji.

265 Videos were imported to Fiji and converted to 8-bit grayscale (File > Import > AVI; the  
266 box of Convert to Grayscale was selected). For two-choice assays, the Rotate feature (Image >  
267 Transform > Rotate) was used to rotate images such that the marker line indicating release zone  
268 was completely vertical. Along the release zone, white lines were drawn at the top and bottom of  
269 the larval motion zone; they must be close to but not in the larval motion zone and applied to the  
270 first image only (Edit > Draw). Then, an area that was slightly larger than the larval motion zone  
271 and included the top and bottom white lines was selected and the Crop feature (Image > Crop) was  
272 applied for all images. Next, background was subtracted from all images (Process > Subtract

273 Background; rolling ball radius of 50.0 pixels). Finally, the brightness/contrast was adjusted to  
274 enhance the difference between the white larva and the black background (Image > Adjust >  
275 Brightness/Contrast; set Maximum to the left and applied; then set Contrast to the right and  
276 applied). The preprocessed image was saved as a .avi file (File > Save as > AVI) for analysis.

277

### 278 **TrackMate Analysis**

279 TrackMate in Fiji was used to analyze the moving distances and preference/avoidance indices  
280 (Tinevez et al., 2017). Preprocessed .tif files or .avi files were opened by Fiji and TrackMate was  
281 run. In the box of the LoG Detector, we suggested to adjust parameters of Estimated blob diameter,  
282 Threshold, and Median filter. For adult flies, set Estimated blob diameter to 27.0 – 40.0 pixels,  
283 Threshold to 1.0 - 2.5, and select Median filter. For larvae, set Estimated blob diameter to about  
284 10.0 pixels, Threshold to 1.0, and deselect Median filter. In the box of Set filters on spots, filters  
285 could be used to remove aberrant ROIs by choosing the X and Y region for ROIs as well as the  
286 Quality of the ROIs found. Alternatively, aberrant ROIs can be removed manually from the  
287 resulting .csv file. In the box of the Simple LAP tracker, the Linking max distance, the Gap-closing  
288 distance, and the Gap-closing max frame gap were suggested to adjust. For adult flies, set the  
289 Linking max distance, the Gap-closing distance to 1500 pixels and the Gap-closing max frame gap  
290 to 2. For larvae, set the Linking max distance, the Gap-closing distance to 25 pixels and the Gap-  
291 closing max frame gap to 2. In the box of Select an action, Export all spot statistics was selected  
292 and Execute was clicked. The All Spots statistics file was cross-referenced with the spot detection  
293 in Fiji to ensure only one spot was marked for each time stamp, with erroneous duplicates and/or  
294 aberrant ROIs deleted. Then the All Spots statistics was saved as .csv files.

295 The moving distance from frame n to the next frame was calculated through the following  
296 formula:

$$297 \quad \Delta Distance = \sqrt{(x_{n+1} - x_n)^2 + (y_{n+1} - y_n)^2}$$

298 The Preference Index (PI) or Avoidance Index (AI) was calculated by using the X position.  
299 The PI for the two-choice assay was calculated based on the time the animal spent in each  
300 temperature zone and using the following formulas:

301 For adults:

$$302 \quad PI = \frac{(\text{time in } 25^{\circ}\text{C}) - (\text{time in } 31^{\circ}\text{C})}{\text{Total time}}$$

303 For larvae:

304 
$$PI = \frac{(\text{time in } 18^{\circ}\text{C}) - (\text{time in } 25^{\circ}\text{C})}{\text{Total time}}$$

305

306 The AI for the adult optogenetic assay was calculated based on the time a fly spent in dark or red  
307 light and using the following formulas:

308 
$$AI = \frac{(\text{time in dark}) - (\text{time in red light})}{\text{Total time}}$$

309

310 **Statistical analysis:**

311 Statistical details of experiments are mentioned in the figure legends. The normality of  
312 distributions was assessed by the Shapiro-Wilk W test ( $p \leq 0.05$  rejected normal distribution).

313 Statistical comparisons of normally distributed data were performed by the Welch's t test. For data  
314 that did not conform to a normal distribution, statistical comparisons were performed by the Mann-

315 Whitney test. Data analysis was performed using GraphPad Prism 9.

316

317 **Competing interest**

318 No competing interests declared

319

320 **Funding**

321 This work was supported by the National Institutes of Health (R21MH122987 to L.N. and  
322 R01GM140130 to L.N.).

323

324 **Data availability**

325 Original statistics and raw data are available at: <https://doi.org/10.7910/DVN/SNBQC2>.

326 **References**

- 327 BELLEN, H. J., TONG, C. & TSUDA, H. 2010. 100 years of Drosophila research and its impact on  
328 vertebrate neuroscience: a history lesson for the future. *Nat Rev Neurosci*, 11, 514-22.
- 329 BRANSON, K., ROBIE, A. A., BENDER, J., PERONA, P. & DICKINSON, M. H. 2009. High-throughput  
330 ethomics in large groups of Drosophila. *Nat Methods*, 6, 451-7.
- 331 BUDELLI, G., NI, L., BERCIU, C., VAN GIESEN, L., KNECHT, Z. A., CHANG, E. C., KAMINSKI, B.,  
332 SILBERING, A. F., SAMUEL, A., KLEIN, M., BENTON, R., NICASTRO, D. & GARRITY, P. A. 2019.  
333 Ionotropic Receptors Specify the Morphogenesis of Phasic Sensors Controlling Rapid  
334 Thermal Preference in Drosophila. *Neuron*.
- 335 COLOMB, J., REITER, L., BLASZKIEWICZ, J., WESSNITZER, J. & BREMBS, B. 2012. Open source  
336 tracking and analysis of adult Drosophila locomotion in Buridan's paradigm with and  
337 without visual targets. *PLoS One*, 7, e42247.
- 338 GALLIO, M., OFSTAD, T. A., MACPHERSON, L. J., WANG, J. W. & ZUKER, C. S. 2011. The coding of  
339 temperature in the Drosophila brain. *Cell*, 144, 614-24.
- 340 KLAPOETKE, N. C., MURATA, Y., KIM, S. S., PULVER, S. R., BIRDSEY-BENSON, A., CHO, Y. K.,  
341 MORIMOTO, T. K., CHUONG, A. S., CARPENTER, E. J., TIAN, Z., WANG, J., XIE, Y., YAN, Z.,  
342 ZHANG, Y., CHOW, B. Y., SUREK, B., MELKONIAN, M., JAYARAMAN, V., CONSTANTINE-  
343 PATON, M., WONG, G. K. & BOYDEN, E. S. 2014. Independent optical excitation of distinct  
344 neural populations. *Nat Methods*, 11, 338-46.
- 345 KNECHT, Z. A., SILBERING, A. F., NI, L., KLEIN, M., BUDELLI, G., BELL, R., ABUIN, L., FERRER, A. J.,  
346 SAMUEL, A. D., BENTON, R. & GARRITY, P. A. 2016. Distinct combinations of variant  
347 ionotropic glutamate receptors mediate thermosensation and hygrosensation in  
348 Drosophila. *Elife*, 5.
- 349 KWON, Y., SHEN, W. L., SHIM, H. S. & MONTELL, C. 2010. Fine thermotactic discrimination  
350 between the optimal and slightly cooler temperatures via a TRPV channel in chordotonal  
351 neurons. *J Neurosci*, 30, 10465-71.
- 352 KWON, Y., SHIM, H. S., WANG, X. & MONTELL, C. 2008. Control of thermotactic behavior via  
353 coupling of a TRP channel to a phospholipase C signaling cascade. *Nat Neurosci*, 11, 871-  
354 3.

- 355 NI, L., BRONK, P., CHANG, E. C., LOWELL, A. M., FLAM, J. O., PANZANO, V. C., THEOBALD, D. L.,  
356 GRIFFITH, L. C. & GARRITY, P. A. 2013. A gustatory receptor paralogue controls rapid  
357 warmth avoidance in *Drosophila*. *Nature*, 500, 580-4.
- 358 SANCHEZ-ALCANIZ, J. A., SILBERING, A. F., CROSET, V., ZAPPIA, G., SIVASUBRAMANIAM, A. K.,  
359 ABUIN, L., SAHAI, S. Y., MUNCH, D., STECK, K., AUER, T. O., CRUCHET, S., NEAGU-MAIER,  
360 G. L., SPRECHER, S. G., RIBEIRO, C., YAPICI, N. & BENTON, R. 2018. An expression atlas of  
361 variant ionotropic glutamate receptors identifies a molecular basis of carbonation sensing.  
362 *Nat Commun*, 9, 4252.
- 363 SCHINDELIN, J., ARGANDA-CARRERAS, I., FRISE, E., KAYNIG, V., LONGAIR, M., PIETZSCH, T.,  
364 PREIBISCH, S., RUEDEN, C., SAALFELD, S., SCHMID, B., TINEVEZ, J. Y., WHITE, D. J.,  
365 HARTENSTEIN, V., ELICEIRI, K., TOMANCAK, P. & CARDONA, A. 2012. Fiji: an open-source  
366 platform for biological-image analysis. *Nat Methods*, 9, 676-82.
- 367 SHEN, W. L., KWON, Y., ADEGBOLA, A. A., LUO, J., CHESS, A. & MONTELL, C. 2011. Function of  
368 rhodopsin in temperature discrimination in *Drosophila*. *Science*, 331, 1333-6.
- 369 SIMÕES, J. M., LEVY, J. I., ZAHARIEVA, E. E., VINSON, L. T., ZHAO, P., ALPERT, M. H., KATH, W. L.,  
370 PARA, A. & GALLIO, M. 2021. Robustness and plasticity in *Drosophila* heat avoidance. *Nat*  
371 *Commun*, 12, 2044.
- 372 STRAW, A. D. & DICKINSON, M. H. 2009. Motmot, an open-source toolkit for realtime video  
373 acquisition and analysis. *Source Code Biol Med*, 4, 5.
- 374 TINEVEZ, J. Y., PERRY, N., SCHINDELIN, J., HOOPES, G. M., REYNOLDS, G. D., LAPLANTINE, E.,  
375 BEDNAREK, S. Y., SHORTE, S. L. & ELICEIRI, K. W. 2017. TrackMate: An open and extensible  
376 platform for single-particle tracking. *Methods*, 115, 80-90.
- 377 TYRRELL, J. J., WILBOURNE, J. T., OMELCHENKO, A. A., YOON, J. & NI, L. 2021. Ionotropic Receptor-  
378 dependent cool cells control the transition of temperature preference in *Drosophila*  
379 larvae. *PLoS Genet*, 17, e1009499.
- 380 VALENTE, D., GOLANI, I. & MITRA, P. P. 2007. Analysis of the trajectory of *Drosophila*  
381 melanogaster in a circular open field arena. *PLoS One*, 2, e1083.



382 WERKHOVEN, Z., ROHRSEN, C., QIN, C., BREMBS, B. & DE BIVORT, B. 2019. MARGO (Massively  
383 Automated Real-time GUI for Object-tracking), a platform for high-throughput ethology.  
384 *PLoS One*, 14, e0224243.

385

386

Methods & Techniques

Analyzing Fly Locomotion by TrackMate

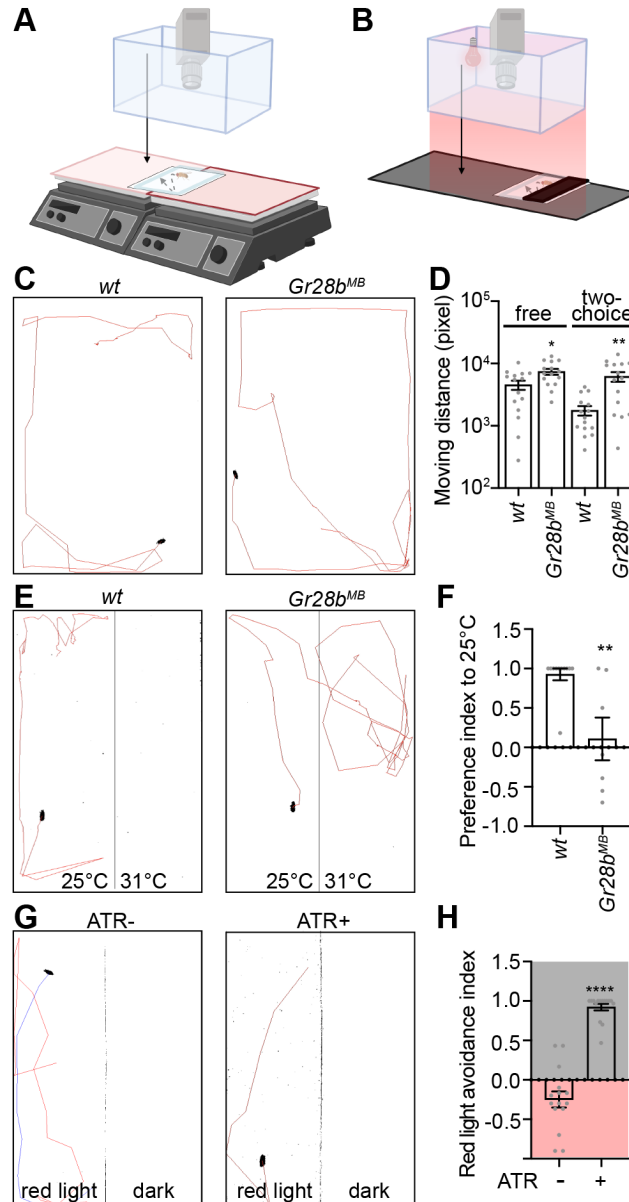

387

388 **Fig 1. Use TrackMate to analyze the adult behavior.** (A,B) Setups for the single-fly two-choice  
389 thermotactic (A) and optogenetic assay (B). The setup for the free motion assay is similar to the  
390 two-choice assay but is performed on a single plate with a unique temperature (25°C). (C) *wt* and  
391 *Gr28b<sup>MB</sup>* trajectories in the free motion assay. (D) Moving distances of indicated genotypes and  
392 conditions. n = 15; data represent mean ± SEM; \* *p* < 0.05, \*\* *p* < 0.01; Welch's test for the free  
393 motion assay and Mann-Whitney test for the two-choice assay. (E) *wt* and *Gr28b<sup>MB</sup>* trajectories in  
394 the two-choice assay. (F) Preference indices of indicated genotypes. n = 7 - 11; data represent  
395 mean ± SEM; \*\* *p* < 0.01; Mann-Whitney test. (G) Trajectories of *HC-Gal4;UAS-CsChrimson*  
396 (*HC>CsChrimson*) flies with or without dietary retinal (ATR) in the optogenetic assay. Of note,

## Methods & Techniques

## Analyzing Fly Locomotion by TrackMate

397 two trajectories (blue and red) are shown in the left panel, suggesting the fly enters the red-light  
398 zone twice. (H) Avoidance indices of *HC>CsChrimson* flies with or without dietary retinal (ATR).  
399  $n = 15$ ; data represent mean  $\pm$  SEM; \*\*\*\*  $p < 0.0001$ ; Mann-Whitney test.

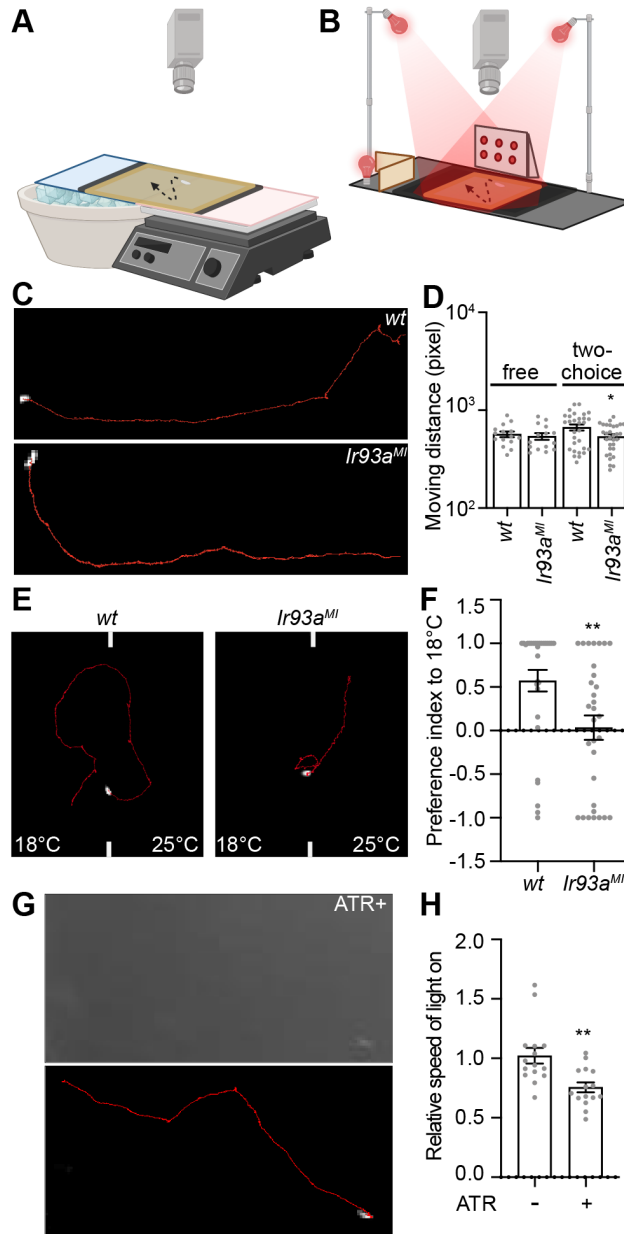

400

401 **Fig 2. Use TrackMate to analyze the larval behavior.** (A,B) Setups for the single-larva two-  
402 choice thermotactic (A) and optogenetic assay (B). The setup for the free motion assay is similar  
403 to the optogenetic assay but is performed in the room light. (C) *wt* and *Ir93a<sup>MI</sup>* trajectories in the  
404 free motion assay. (D) Moving distances of indicated genotypes and conditions. n = 15 - 30; data  
405 represent mean  $\pm$  SEM; \*  $p < 0.05$ ; Welch's test for the free motion assay and Mann-Whitney test  
406 for the two-choice assay. (E) *wt* and *Ir93a<sup>MI</sup>* trajectories in the two-choice assay. (F) Preference  
407 indices of indicated genotypes. n = 30; data represent mean  $\pm$  SEM; \*\*  $p < 0.01$ ; Mann-Whitney  
408 test. (G) The locomotion of an *Ir21a-Gal4; UAS-CsChrimson* (*Ir21a>CsChrimson*) larva with

## Methods & Techniques

## Analyzing Fly Locomotion by TrackMate

409 ATR in the optogenetic assay. Upper: the video is gray scaled and cropped by Fiji. Lower: the  
410 recording is preprocessed by Fiji and analyzed by TrackMate. (H) The relative speed of  
411 *Ir21a>CsChrimson* larvae with or without ATR. Relative speed is defined as the moving speed  
412 during red light on divided by the moving speed during light off. n = 15; data represent mean  $\pm$   
413 SEM; \*\*  $p < 0.01$ ; Mann-Whitney test.

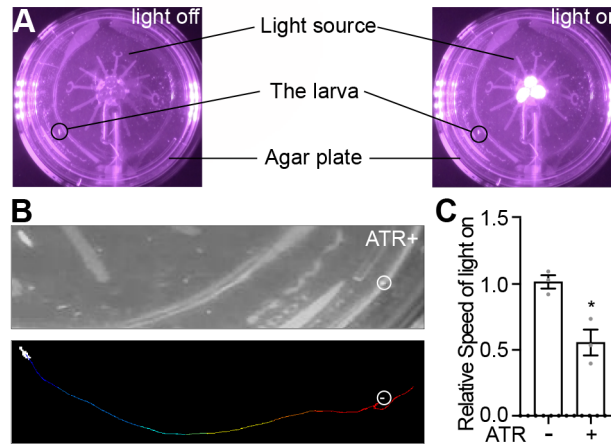

414

415 **Fig 3. Use TrackMate to analyze non-optimal recordings.** (A) A previous setup of the single-  
416 larva optogenetic assay, in which light glares and other background noise signals are detected. (B)  
417 The locomotion of an *Ir21a>CsChrimson* larva with dietary retinal (ATR). Upper: the video is  
418 gray scaled and cropped by Fiji. Lower: the recording is preprocessed by Fiji and analyzed by  
419 TrackMate. The trajectory is shown in rainbow colors. (C) The relative speed of  
420 *Ir21a>CsChrimson* larvae with or without ATR. n = 3; data represent mean ± SEM; \*  $p < 0.05$ ;  
421 Welch's test.

422 **Movie 1. Representative trajectories of *Drosophila* adult and larval behaviors.** The following  
423 behaviors are included: the *wt* and *Gr28b<sup>MB</sup>* single-fly free movement and two-choice thermotactic  
424 assays, *HC>CsChrimson* single-fly optogenetic assay (without and with dietary ATR), and *wt* and  
425 *Ir93a<sup>MI</sup>* single-larva free movement and two-choice thermotactic assays.  
426
